# Supplementary material for: Using the Aqueous Phase Produced from Hydrothermal Carbonization Process of Brown Seaweed to Improve the Growth of Phaseolus vulgaris
Source: MDPI journal article supplement (doi:10.3390/plants12142745), 2023-07-24
Supplement: s1 [file s1]

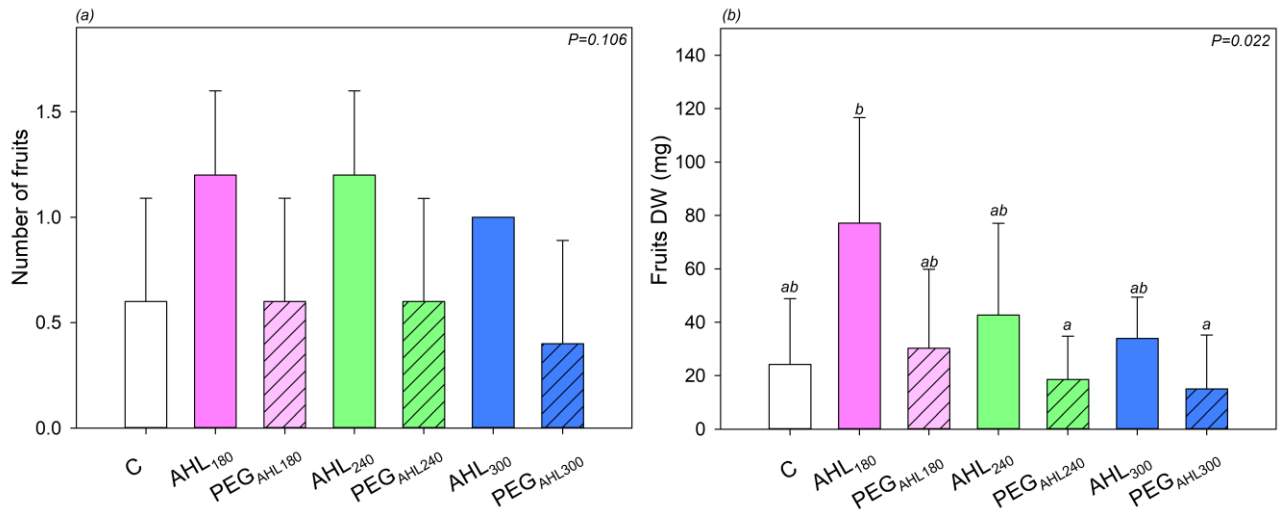

**Figure S1:** Mean value  $\pm$  SD ( $n=5$ ) of **(a)** number of fruits and **(b)** fruits dry weight (Fruits DW) recorded in samples which seed were soaked into water (control samples, C), AHL<sub>180</sub> solution and the corresponding PEG isotonic solution (AHL<sub>180</sub> and PEG<sub>AHL180</sub> samples, respectively), AHL<sub>240</sub> solution and corresponding PEG isotonic solution (AHL<sub>240</sub> and PEG<sub>AHL240</sub> samples, respectively), AHL<sub>300</sub> solution and corresponding PEG isotonic solution (AHL<sub>300</sub> and PEG<sub>AHL300</sub> samples, respectively). Different letters indicate statistically different values based on One-way Anova test.  $P$  values are reported.
