# Supplementary material for: Using the Aqueous Phase Produced from Hydrothermal Carbonization Process of Brown Seaweed to Improve the Growth of Phaseolus vulgaris
Source: Plants (Basel). 2023 Jul 24;12(14):2745. doi: 10.3390/plants12142745 (PMC10383230; doi:10.3390/plants12142745)
Supplement: Supplementary file 1 [file plants-12-02745-s001.zip › Table S1.xlsx]

## Sheet: Foglio1
Table S1: Correlation matrix of 22 measured leaf traits. Values of correlation coefficients are reported. *** P < 0.001; ** P < 0.01; * P < 0.05
	Altot (cm2)	AL (cm2)	LMA (g m-2)	LMDC ( m-2 g)	Lstem (cm)	stem dry weight (mg)	leaf dry weight (mg)	root dry weight (mg)	whole plant dry weight (mg)	shoot/root ratio	gL (mmol m-2 s-1)	EL (mmol m-2 s-1)	An (mmol m-2 s-1)	WUE (mmol m-2s-1 CO2/mmol m-2 s-1 H2O)	po (MPa)	Ytlp (MPa)	C (mg g-1)	N (mg g-1)	C (%)	N (%)	C:N	stomatal density (m-2)
Altot (cm2)		0.944**	-0.0115	-0.0382	0.899***	0.842*	0.916**	-0.295	0.648	0.682	0.851*	0.876**	0.816*	0.625	-0.0825	0.291	-0.318	0.213	0.214	0.321	-0.358	0.53
AL (cm2)	0.944**		-0.14	0.0489	0.925**	0.858*	0.912**	-0.322	0.638	0.68	0.883**	0.898**	0.917**	0.773*	-0.0634	0.254	-0.147	0.124	0.35	0.168	-0.202	0.717
LMA (g m-2)	-0.0115	-0.14		-0.969***	-0.294	-0.526	-0.375	-0.395	-0.587	0.271	-0.263	-0.375	-0.343	-0.284	-0.197	-0.358	-0.039	0.84*	-0.32	0.771*	-0.72	-0.163
LMDC ( m-2 g)	-0.0382	0.0489	-0.969***		0.232	0.499	0.352	0.486	0.612	-0.394	0.236	0.255	0.279	0.263	0.319	0.466	-0.0315	-0.92**	0.341	-0.801*	0.76*	0.0807
Lstem (cm)	0.899***	0.925**	-0.294	0.232		0.892***	0.937***	-0.238	0.706	0.604	0.938**	0.914**	0.931**	0.731	-0.184	0.205	-0.295	0.0325	0.204	0.147	-0.184	0.762*
stem dry weight (mg)	0.842*	0.858*	-0.526	0.499	0.892***		0.983***	-0.0305	0.873*	0.395	0.851*	0.878**	0.859*	0.705	0.169	0.55	-0.218	-0.328	0.452	-0.197	0.148	0.517
leaf dry weight (mg)	0.916**	0.912**	-0.375	0.352	0.937***	0.983***		-0.0925	0.846*	0.473	0.908**	0.891**	0.896**	0.742*	0.0937	0.481	-0.289	-0.176	0.386	-0.0319	-0.012	0.577
root dry weight (mg)	-0.295	-0.322	-0.395	0.486	-0.238	-0.0305	-0.0925		0.45	-0.882**	0.0311	-0.131	-0.0334	0.139	0.00432	-0.0275	-0.592	-0.566	-0.284	-0.257	0.212	-0.288
whole plant dry weight (mg)	0.648	0.638	-0.587	0.612	0.706	0.873*	0.846*	0.45		-0.0524	0.814*	0.729	0.776*	0.727	0.11	0.439	-0.542	-0.496	0.221	-0.211	0.147	0.351
shoot/root ratio	0.682	0.68	0.271	-0.394	0.604	0.395	0.473	-0.882**	-0.0524		0.366	0.56	0.404	0.149	-0.176	0.038	0.266	0.578	0.205	0.394	-0.386	0.462
gL (mmol m-2 s-1)	0.851*	0.883**	-0.263	0.236	0.938**	0.851*	0.908**	0.0311	0.814*	0.366		0.843*	0.973***	0.879**	-0.183	0.157	-0.494	-0.0343	0.134	0.175	-0.216	0.765*
EL (mmol m-2 s-1)	0.876**	0.898**	-0.375	0.255	0.914**	0.878**	0.891**	-0.131	0.729	0.56	0.843*		0.861*	0.619	-0.265	0.135	-0.302	0.0189	0.113	0.123	-0.187	0.572
An (mmol m-2 s-1)	0.816*	0.917**	-0.343	0.279	0.931**	0.859*	0.896**	-0.0334	0.776*	0.404	0.973***	0.861*		0.919**	-0.138	0.165	-0.319	-0.0848	0.256	0.0544	-0.0954	0.832*
WUE (mmol m-2s-1 CO2/mmol m-2 s-1 H2O)	0.625	0.773*	-0.284	0.263	0.731	0.705	0.742*	0.139	0.727	0.149	0.879**	0.619	0.919**		0.0375	-0.281	-0.202	0.352	0.439	-0.0542	0.0284	0.799*
po (MPa)	-0.0825	-0.0634	-0.197	0.319	-0.184	0.169	0.0937	0.00432	0.11	-0.176	-0.183	-0.265	-0.138	0.0375		0.891**	0.481	-0.597	0.848*	-0.689	0.72	-0.268
Ytlp (MPa)	0.291	0.254	-0.358	0.466	0.205	0.55	0.481	-0.0275	0.439	0.038	0.157	0.135	0.165	-0.281	0.891**		0.259	-0.606	0.827*	-0.61	0.615	-0.119
C (mg g-1)	-0.318	-0.147	-0.039	-0.0315	-0.295	-0.218	-0.289	-0.592	-0.542	0.266	-0.494	-0.302	-0.319	-0.202	0.481	0.259		-0.0927	0.625	-0.492	0.539	-0.0518
N (mg g-1)	0.213	0.124	0.84*	-0.92**	0.0325	-0.328	-0.176	-0.566	-0.496	0.578	-0.0343	0.0189	-0.0848	0.352	-0.597	-0.606	-0.0927		-0.495	0.911**	-0.888**	0.112
C (%)	0.214	0.35	-0.32	0.341	0.204	0.452	0.386	-0.284	0.221	0.205	0.134	0.113	0.256	0.439	0.848*	0.827*	0.625	-0.495		-0.67	0.691	0.195
N (%)	0.321	0.168	0.771*	-0.801*	0.147	-0.197	-0.0319	-0.257	-0.211	0.394	0.175	0.123	0.0544	-0.0542	-0.689	-0.61	-0.492	0.911**	-0.67		-0.996***	0.118
C:N	-0.358	-0.202	-0.72	0.76*	-0.184	0.148	-0.012	0.212	0.147	-0.386	-0.216	-0.187	-0.0954	0.0284	0.72	0.615	0.539	-0.888**	0.691	-0.996***		-0.12
stomatal density (m-2)	0.53	0.717	-0.163	0.0807	0.762*	0.517	0.577	-0.288	0.351	0.462	0.765*	0.572	0.832*	0.799*	-0.268	-0.119	-0.0518	0.112	0.195	0.118	-0.12
